# Supplementary material for: Domestic Sautéing with EVOO: Change in the Phenolic Profile
Source: PubMed Central journal article supplement (PMC7022658; doi:10.3390/antiox9010077), 2020-01-16
Supplement: antioxidants-09-00077-s001.pdf [file antioxidants-09-00077-s001.pdf]

Table S1. Ionization conditions for compounds analyzed with the method 1.

| Compound                | Transitionn | Declustering Potential | Focusing Potential | Entrance Potential | Collision Energy | Dwell Time (ms) | Retention Time (min) |
|-------------------------|-------------|------------------------|--------------------|--------------------|------------------|-----------------|----------------------|
| HDCM-OA                 | 335/199     | -30                    | -140               | -10                | -30              | 30              | 7.4                  |
| HOA                     | 393/257     | -30                    | -140               | -10                | -30              | 20              | 8.1                  |
| Elenolic acid           | 241/127     | -30                    | -140               | -10                | -30              | 50              | 6.3                  |
| Hydroxyelenolic acid    | 257/137     | -30                    | -140               | -10                | -30              | 30              | 5.9                  |
| Hydroxytyrosol acetate  | 195/153     | -30                    | -140               | -10                | -30              | 20              | 10                   |
| Hydroxytyrosol          | 153/123     | -40                    | -250               | -10                | -20              | 25              | 1.1                  |
| Apigenin                | 269/117     | -70                    | -200               | -10                | -50              | 30              | 9.2                  |
| Luteolin                | 285/133     | -100                   | -340               | -10                | -50              | 30              | 8.3                  |
| Ferulic acid            | 193/134     | -40                    | -170               | -10                | -20              | 20              | 5.2                  |
| <i>p</i> -Coumaric acid | 163/119     | -40                    | -150               | -10                | -25              | 30              | 4.3                  |
| Pinoresinol             | 357/151     | -60                    | -180               | -8                 | -25              | 20              | 8.7                  |

Table S2: Ionization conditions for compounds analyzed with the method 2

| Compound             | Transitionn | Declustering Potential | Focusing Potential | Entrance Potential | Collision Energy | Dwell Time (ms) | Retention Time (min) |
|----------------------|-------------|------------------------|--------------------|--------------------|------------------|-----------------|----------------------|
| Ligstroside aglycone | 361/291     | -40                    | -170               | -5                 | -10              | 150             | 2.7                  |
| Oleocanthal          | 303/285     | -40                    | -170               | -5                 | -10              | 50              | 2.4                  |
| Oleuropein aglycone  | 377/275     | -45                    | -140               | -5                 | -15              | 150             | 2.5                  |
| Oleacein             | 319/69      | -30                    | -170               | -5                 | -30              | 50              | 2.3                  |
